# Supplementary material
Source: PubMed Central journal article supplement (PMC6909759)
Supplement: Supp_Fig1.pdf [file Supp_Fig1.pdf]

## Supplementary Data

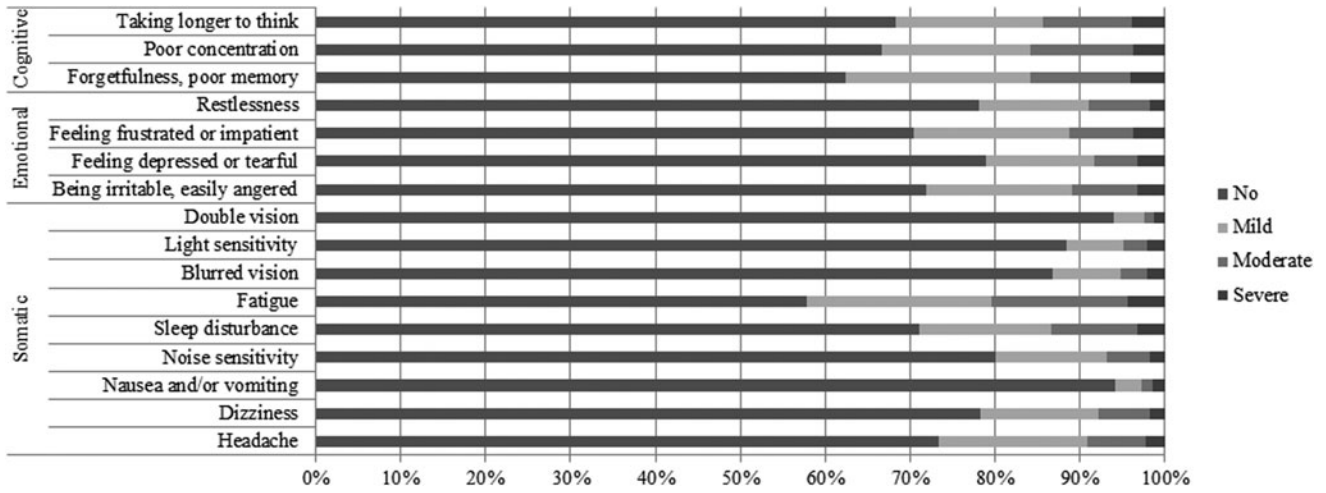

**SUPPLEMENTARY FIG. S1.** Number of respondents per rating score per item of the Rivermead Post-Concussion Symptoms Questionnaire.
