# Supplementary material
Source: PubMed Central journal article supplement (PMC6909759)
Supplement: Supp_Tables1-4.pdf [file Supp_Tables1-4.pdf]

SUPPLEMENTARY TABLE S1. CHARACTERISTICS OF THE STUDY POPULATION WITH POST-CONCUSSION SYNDROME PER CLASSIFICATION METHOD WITH RATING SCORE 2

|                              | Mapped ICD-10/DSM-IV |             |         | RPQ total score |              |         | RPQ3           |             |         | Three-factor model |              |         |
|------------------------------|----------------------|-------------|---------|-----------------|--------------|---------|----------------|-------------|---------|--------------------|--------------|---------|
|                              | PCS                  | No PCS      | p value | PCS             | No PCS       | p value | PCS            | No PCS      | p value | PCS                | No PCS       | p value |
| <i>n</i>                     | 283                  | 448         |         | 234             | 497          |         | 261            | 470         |         | 231                | 500          |         |
| Gender (male)                | 161 (56.9%)          | 302 (67.4%) | < 0.01  | 133 (56.8%)     | 330 (66.4%)  | 0.01    | 132 (50.6%)    | 331 (70.4%) | < 0.01  | 133 (57.6%)        | 330 (66.0%)  | 0.03    |
| Age <sup>a</sup> (years)     | 45 (31-56)           | 43 (26-57)  | 0.14    | 47 (32-57)      | 42 (25.5-56) | 0.01    | 44 (30.5-56.5) | 43 (26-57)  | 0.26    | 45 (31-56)         | 43.5 (26-57) | 0.32    |
| Education                    |                      |             | <0.01   |                 |              | < 0.01  |                |             | 0.01    |                    |              | < 0.01  |
| Primary                      | 6 (2.1%)             | 15 (3.3%)   |         | 5 (2.1%)        | 16 (3.2%)    |         | 7 (2.7%)       | 14 (3.0%)   |         | 2 (0.9%)           | 19 (3.8%)    |         |
| Secondary                    | 142 (50.2%)          | 194 (43.3%) |         | 122 (52.1%)     | 214 (43.1%)  |         | 127 (48.7%)    | 209 (44.5%) |         | 123 (53.2%)        | 213 (42.6%)  |         |
| Higher professional          | 32 (11.3%)           | 76 (17.0%)  |         | 27 (11.5%)      | 81 (16.3%)   |         | 35 (13.4%)     | 73 (15.5%)  |         | 28 (12.1%)         | 80 (16.0%)   |         |
| Academic                     | 18 (6.4%)            | 66 (14.7%)  |         | 14 (6.0%)       | 70 (14.1%)   |         | 17 (6.5%)      | 67 (14.3%)  |         | 14 (6.1%)          | 70 (14.0%)   |         |
| Unknown                      | 85 (30.0)            | 97 (21.7%)  | 0.03    | 66 (28.2%)      | 116 (23.3%)  | < 0.01  | 75 (28.7%)     | 107 (22.8%) | 0.01    | 64 (27.7%)         | 118 (23.6%)  | < 0.01  |
| Injury mechanism             |                      |             |         |                 |              |         |                |             |         |                    |              |         |
| Road traffic accident        | 139 (49.1%)          | 212 (47.3%) |         | 113 (48.3%)     | 238 (47.9%)  |         | 134 (51.3%)    | 217 (46.2%) |         | 109 (47.2%)        | 242 (48.4%)  |         |
| Fall                         | 96 (34.9%)           | 144 (32.1%) |         | 77 (32.9%)      | 163 (32.8%)  |         | 77 (29.5%)     | 163 (34.7%) |         | 79 (34.2%)         | 161 (32.2%)  |         |
| Sports                       | 19 (6.7%)            | 58 (12.9%)  |         | 14 (6.0%)       | 63 (12.7%)   |         | 18 (6.9%)      | 59 (12.6%)  |         | 13 (5.6%)          | 64 (12.8%)   |         |
| Assault                      | 22 (7.8%)            | 19 (4.2%)   |         | 22 (9.4%)       | 19 (3.8%)    |         | 22 (8.4%)      | 19 (4.0%)   |         | 22 (9.5%)          | 19 (3.8%)    |         |
| Other/Unknown                | 7 (2.6%)             | 14 (3.3)    |         | 8 (3.4%)        | 14 (2.8%)    |         | 10 (3.8%)      | 12 (2.6%)   |         | 8 (3.5%)           | 14 (2.8%)    |         |
| Injury characteristics       |                      |             |         |                 |              |         |                |             |         |                    |              |         |
| ISS <sup>a</sup>             | 8 (5-16)             | 5 (4-13)    | < 0.01  | 9 (5-17)        | 5 (4-12)     | < 0.01  | 6 (4-14)       | 6 (4-14)    | 0.67    | 8 (5-17)           | 5 (4-13)     | < 0.01  |
| AISH <sup>a</sup>            | 2 (2-3)              | 2 (1-2)     | < 0.01  | 2 (2-3)         | 2 (1-2)      | < 0.01  | 2 (2-3)        | 2 (1-2)     | 0.02    | 2 (2-3)            | 2 (1-2)      | < 0.01  |
| Head AIS 3                   | 42 (14.8%)           | 51 (11.4%)  |         | 35 (15.0%)      | 58 (11.7%)   |         | 39 (14.9%)     | 54 (11.5%)  |         | 30 (13.0%)         | 63 (12.6%)   |         |
| Head AIS 4                   | 30 (10.6%)           | 27 (6.0%)   |         | 30 (12.8%)      | 27 (5.4%)    |         | 25 (9.6%)      | 32 (6.8%)   |         | 26 (11.3%)         | 31 (6.2%)    |         |
| Head AIS 5                   | 6 (2.1%)             | 5 (1.1%)    | < 0.01  | 7 (3.0%)        | 4 (0.8%)     | < 0.01  | 5 (1.9%)       | 6 (1.3%)    | 0.10    | 7 (3.0%)           | 4 (0.8%)     | < 0.01  |
| Comorbidity <sup>b</sup>     |                      |             |         |                 |              |         |                |             |         |                    |              |         |
| No pre-existing disease      | 102 (36.0%)          | 227 (50.7%) |         | 82 (35.0%)      | 247 (49.7%)  |         | 101 (38.7%)    | 228 (48.5%) |         | 82 (35.5%)         | 247 (49.4%)  |         |
| 1 comorbid disease           | 36 (12.7%)           | 56 (12.5%)  |         | 29 (12.4%)      | 63 (12.7%)   |         | 27 (10.3%)     | 65 (13.8%)  |         | 30 (13.0%)         | 62 (12.4%)   |         |
| 2 comorbid disease           | 13 (4.6%)            | 20 (4.5%)   |         | 11 (4.7%)       | 22 (4.4%)    |         | 15 (5.7%)      | 18 (3.8%)   |         | 12 (5.2%)          | 21 (4.2%)    |         |
| 3 or more comorbidities      | 24 (8.5%)            | 16 (3.6%)   |         | 23 (9.8%)       | 17 (3.4%)    |         | 21 (8.0%)      | 19 (4.0%)   |         | 22 (9.5%)          | 18 (3.6%)    |         |
| Unknown                      | 108 (38.2%)          | 129 (28.8%) | 0.95    | 89 (38.0%)      | 148 (29.8%)  | 0.37    | 97 (37.2%)     | 140 (29.8%) | 0.86    | 85 (36.8%)         | 152 (30.4%)  | 0.86    |
| CT scan                      |                      |             |         |                 |              |         |                |             |         |                    |              |         |
| No CT scan                   | 17 (6.0%)            | 28 (6.3%)   |         | 11 (4.7%)       | 34 (6.8%)    |         | 16 (6.2%)      | 29 (6.2%)   |         | 13 (5.7%)          | 32 (6.4%)    |         |
| CT scan, no abnormalities    | 223 (78.8%)          | 368 (82.1%) |         | 181 (77.7%)     | 410 (82.5%)  |         | 207 (79.6%)    | 384 (81.7%) |         | 178 (77.4%)        | 413 (82.6%)  |         |
| CT scan, abnormalities       | 42 (14.8%)           | 52 (11.6%)  |         | 41 (17.6%)      | 53 (10.7%)   |         | 37 (14.2%)     | 57 (12.1%)  |         | 39 (17.0%)         | 55 (11.0%)   |         |
| Hospitalization <sup>c</sup> |                      |             |         |                 |              |         |                |             |         |                    |              |         |
| Hospital admission           | 180 (63.6%)          | 193 (43.1%) | < .01   | 149 (63.7%)     | 224 (45.1%)  | < 0.01  | 143 (54.8%)    | 230 (48.9%) | 0.12    | 145 (62.8%)        | 228 (45.6%)  | < 0.01  |
| Number of days <sup>a</sup>  | 4 (1-9)              | 3 (1-6)     | .37     | 5 (1-10)        | 2 (1-6)      | < 0.01  | 3 (1-9)        | 3 (1-7.25)  | 0.37    | 4 (1-9)            | 3 (1-7)      | < 0.01  |
| ICU admission                | 22 (7.8%)            | 13 (2.9%)   | < .01   | 20 (8.5%)       | 15 (3.6%)    | < 0.01  | 15 (5.7%)      | 20 (4.3%)   | 0.37    | 18 (7.8%)          | 17 (3.4%)    | 0.01    |

<sup>a</sup>Data are displayed as median, with the first and third quartile given within parentheses.

<sup>b</sup>Comorbidity is defined as the presence of any co-existing diseases or disease processes additional to injury that the traumatic brain injury (TBI) patients sustained. The following diseases were assessed as comorbid disease: asthma, chronic bronchitis, chronic nonspecific lung disease (not asked about), heart disease, diabetes, back hernia or chronic backache, osteoarthritis, rheumatoid arthritis, and cancer.

<sup>c</sup>Hospital or ICU admission for ≥1 day after arrival at emergency department.

<sup>d</sup>ICD, International Classification of Diseases; DSM, Diagnostic and Statistical Manual of Mental Disorders; RPQ, Rivermead Post-Concussion Symptoms Questionnaire;

PCS, post-concussion syndrome; ISS, Injury Severity Scale; AISH, Abbreviated Injury Severity Scale of the Head; AIS, Abbreviated Injury Severity Scale; ICU = intensive care unit.

SUPPLEMENTARY TABLE S2. CHARACTERISTICS OF THE STUDY POPULATION WITH POST-CONCUSSION SYNDROME PER CLASSIFICATION METHOD WITH RATING SCORE 3

|                              | Mapped ICD-10/DSM-IV |              |         |                  | RPQ total score |        |                      |              | RPQ3           |              |         |                | Three factor model |                |              |                |        |
|------------------------------|----------------------|--------------|---------|------------------|-----------------|--------|----------------------|--------------|----------------|--------------|---------|----------------|--------------------|----------------|--------------|----------------|--------|
|                              | PCS                  | No PCS       | P value |                  | PCS             | No PCS | P value              |              | PCS            | No PCS       | P value |                | PCS                | No PCS         | P value      |                |        |
| <i>n</i>                     | 113                  | 618          |         | 125              | 606             |        | 96                   | 635          | 83             | 648          |         | 48             | 415                | 48             | 415          | 648            |        |
| Gender (male)                | 59 (52.2%)           | 404 (65.4%)  | < 0.01  | 68 (54.4%)       | 395 (65.2%)     | 0.02   | 46 (47.9%)           | 417 (65.7%)  | 48 (57.8%)     | 415 (64.0%)  | < 0.01  | 48 (57.8%)     | 415 (64.0%)        | 48 (57.8%)     | 415 (64.0%)  | 48 (57.8%)     | 0.27   |
| Age <sup>a</sup> (years)     | 43 (30.5 - 54)       | 44 (27 - 57) | 0.83    | 46 (31.5 - 55.5) | 43 (27 - 57)    | 0.32   | 46.5 (34.25 - 53.75) | 43 (26 - 57) | 42 (26 - 53)   | 44 (27 - 57) | 0.42    | 42 (26 - 53)   | 44 (27 - 57)       | 42 (26 - 53)   | 44 (27 - 57) | 42 (26 - 53)   | 0.46   |
| Education                    |                      |              | < 0.01  |                  |                 | < 0.01 |                      |              |                |              | 0.02    |                |                    |                |              |                | 0.03   |
| Primary                      | 1 (0.9%)             | 20 (3.2%)    |         | 3 (2.4%)         | 18 (3.0%)       |        | 2 (2.1%)             | 19 (3.0%)    | -              | 21 (3.2%)    |         | 2 (2.1%)       | 19 (3.0%)          | 2 (2.1%)       | 21 (3.2%)    | 2 (2.1%)       |        |
| Secondary                    | 63 (55.8%)           | 273 (44.2%)  |         | 68 (54.4%)       | 268 (44.2%)     |        | 50 (52.1%)           | 268 (45.0%)  | 48 (51.8%)     | 293 (45.2%)  |         | 48 (51.8%)     | 293 (45.2%)        | 48 (51.8%)     | 293 (45.2%)  | 48 (51.8%)     |        |
| Higher professional          | 11 (9.7%)            | 97 (15.7%)   |         | 12 (9.6%)        | 96 (15.8%)      |        | 10 (10.4%)           | 98 (15.4%)   | 7 (8.4%)       | 101 (15.6%)  |         | 7 (8.4%)       | 101 (15.6%)        | 7 (8.4%)       | 101 (15.6%)  | 7 (8.4%)       |        |
| Academic                     | 6 (5.3%)             | 78 (12.6%)   |         | 7 (5.6%)         | 77 (12.7%)      |        | 5 (5.2%)             | 79 (12.4%)   | 5 (6.0%)       | 79 (12.2%)   |         | 5 (6.0%)       | 79 (12.4%)         | 5 (6.0%)       | 79 (12.2%)   | 5 (6.0%)       |        |
| Unknown                      | 32 (28.3%)           | 150 (24.3%)  |         | 35 (28.0%)       | 147 (24.3%)     |        | 29 (30.2%)           | 153 (24.1%)  | 28 (33.7%)     | 154 (23.8%)  |         | 28 (33.7%)     | 154 (23.8%)        | 28 (33.7%)     | 154 (23.8%)  | 28 (33.7%)     |        |
| Injury mechanism             |                      |              | < 0.01  |                  |                 | < 0.01 |                      |              |                |              | < 0.01  |                |                    |                |              |                | 0.02   |
| Road traffic accident        | 53 (46.9%)           | 298 (48.2%)  |         | 57 (45.6%)       | 294 (48.5%)     |        | 44 (45.8%)           | 307 (48.3%)  | 40 (48.2%)     | 311 (48.0%)  |         | 40 (48.2%)     | 311 (48.0%)        | 40 (48.2%)     | 311 (48.0%)  | 40 (48.2%)     |        |
| Fall                         | 37 (32.7%)           | 203 (32.8%)  |         | 44 (35.2%)       | 196 (32.3%)     |        | 32 (33.3%)           | 208 (32.8%)  | 27 (32.5%)     | 213 (32.9%)  |         | 27 (32.5%)     | 213 (32.9%)        | 27 (32.5%)     | 213 (32.9%)  | 27 (32.5%)     |        |
| Sports                       | 5 (4.4%)             | 72 (11.7%)   |         | 5 (4.0%)         | 72 (11.9%)      |        | 5 (5.2%)             | 72 (11.3%)   | 3 (3.6%)       | 74 (11.4%)   |         | 3 (3.6%)       | 74 (11.4%)         | 3 (3.6%)       | 74 (11.4%)   | 3 (3.6%)       |        |
| Assault                      | 13 (11.5%)           | 28 (4.5%)    |         | 12 (9.6%)        | 29 (4.8%)       |        | 13 (13.5%)           | 28 (4.4%)    | 10 (12.0%)     | 31 (4.8%)    |         | 10 (12.0%)     | 31 (4.8%)          | 10 (12.0%)     | 31 (4.8%)    | 10 (12.0%)     |        |
| Other/Unknown                | 5 (4.4%)             | 17 (2.6%)    |         | 7 (4.0%)         | 14 (2.5%)       |        | 2 (2.1%)             | 20 (3.1%)    | 2 (2.4%)       | 18 (2.9%)    |         | 2 (2.4%)       | 18 (2.9%)          | 2 (2.4%)       | 18 (2.9%)    | 2 (2.4%)       |        |
| Injury characteristics       |                      |              |         |                  |                 |        |                      |              |                |              |         |                |                    |                |              |                |        |
| ISS <sup>a</sup>             | 9 (4 - 17)           | 6 (4 - 13)   | 0.01    | 9 (4.5 - 17)     | 6 (4 - 13)      | < 0.01 | 6 (5 - 15.5)         | 6 (4 - 14)   | 9 (4 - 17)     | 6 (4 - 13)   | 0.80    | 9 (4 - 17)     | 6 (4 - 13)         | 9 (4 - 17)     | 6 (4 - 13)   | 9 (4 - 17)     | 0.04   |
| AISH <sup>a</sup>            | 2 (1 - 3)            | 2 (2 - 2)    | 0.02    | 2 (1 - 3)        | 2 (2 - 2)       | 0.02   | 2 (2 - 2)            | 2 (2 - 2)    | 2 (2 - 3)      | 2 (1.25 - 2) | < 0.01  | 2 (2 - 3)      | 2 (1.25 - 2)       | 2 (2 - 3)      | 2 (1.25 - 2) | 2 (1.25 - 2)   | < 0.01 |
| Head AIS 3                   | 11 (9.7%)            | 82 (13.3%)   |         | 16 (12.8%)       | 77 (12.7%)      |        | 8 (8.3%)             | 85 (13.4%)   | 6 (7.2%)       | 87 (13.4%)   |         | 6 (7.2%)       | 87 (13.4%)         | 6 (7.2%)       | 87 (13.4%)   | 6 (7.2%)       |        |
| Head AIS 4                   | 18 (15.9%)           | 39 (6.3%)    |         | 18 (14.4%)       | 39 (6.4%)       |        | 10 (10.4%)           | 47 (7.4%)    | 14 (16.9%)     | 43 (6.6%)    |         | 14 (16.9%)     | 43 (6.6%)          | 14 (16.9%)     | 43 (6.6%)    | 14 (16.9%)     |        |
| Head AIS 5                   | 4 (3.5%)             | 7 (1.1%)     |         | 4 (3.2%)         | 7 (1.2%)        |        | 4 (4.2%)             | 7 (1.1%)     | 4 (4.8%)       | 7 (1.1%)     |         | 4 (4.8%)       | 7 (1.1%)           | 4 (4.8%)       | 7 (1.1%)     | 4 (4.8%)       |        |
| Comorbidity <sup>b</sup>     |                      |              | 0.32    |                  |                 | 0.04   |                      |              |                |              | 0.10    |                |                    |                |              |                | 0.60   |
| No pre-existing disease      | 43 (38.1%)           | 286 (46.3%)  |         | 44 (35.2%)       | 285 (47.0%)     |        | 35 (36.5%)           | 294 (46.3%)  | 31 (37.3%)     | 298 (46.0%)  |         | 31 (37.3%)     | 298 (46.0%)        | 31 (37.3%)     | 298 (46.0%)  | 31 (37.3%)     |        |
| 1 comorbid disease           | 8 (7.1%)             | 84 (13.6%)   |         | 12 (9.6%)        | 80 (13.2%)      |        | 8 (8.3%)             | 84 (13.2%)   | 8 (9.6%)       | 84 (13.0%)   |         | 8 (9.6%)       | 84 (13.0%)         | 8 (9.6%)       | 84 (13.0%)   | 8 (9.6%)       |        |
| 2 comorbid disease           | 6 (5.3%)             | 27 (4.4%)    |         | 8 (6.4%)         | 25 (4.1%)       |        | 6 (6.3%)             | 27 (4.3%)    | 4 (4.8%)       | 29 (4.5%)    |         | 4 (4.8%)       | 29 (4.5%)          | 4 (4.8%)       | 29 (4.5%)    | 4 (4.8%)       |        |
| 3 or more comorbidities      | 13 (11.5%)           | 27 (4.4%)    |         | 14 (11.2%)       | 26 (4.3%)       |        | 12 (12.5%)           | 28 (4.4%)    | 6 (7.2%)       | 29 (4.5%)    |         | 6 (7.2%)       | 29 (4.5%)          | 6 (7.2%)       | 29 (4.5%)    | 6 (7.2%)       |        |
| Unknown                      | 43 (38.1%)           | 194 (31.4%)  |         | 47 (37.6%)       | 190 (31.4%)     |        | 35 (36.5%)           | 202 (31.8%)  | 34 (41.0%)     | 203 (31.3%)  |         | 34 (41.0%)     | 203 (31.3%)        | 34 (41.0%)     | 203 (31.3%)  | 34 (41.0%)     |        |
| CT scan                      | 4 (3.6%)             | 41 (6.6%)    | 0.37    | 5 (4.0%)         | 40 (6.6%)       | 0.45   | 4 (4.2%)             | 41 (6.5%)    | 3 (3.6%)       | 42 (6.5%)    |         | 3 (3.6%)       | 42 (6.5%)          | 3 (3.6%)       | 42 (6.5%)    | 3 (3.6%)       | 0.29   |
| No CT scan                   | 86 (76.8%)           | 505 (81.7%)  |         | 96 (77.4%)       | 495 (81.7%)     |        | 79 (82.3%)           | 512 (80.8%)  | 60 (72.3%)     | 531 (82.1%)  |         | 60 (72.3%)     | 531 (82.1%)        | 60 (72.3%)     | 531 (82.1%)  | 60 (72.3%)     |        |
| CT scan, no abnormalities    |                      |              |         |                  |                 |        |                      |              |                |              |         |                |                    |                |              |                |        |
| CT scan, abnormalities       | 22 (19.6%)           | 72 (11.7%)   |         | 23 (18.5%)       | 71 (11.7%)      |        | 13 (13.5%)           | 81 (12.8%)   | 20 (24.1%)     | 74 (11.4%)   |         | 20 (24.1%)     | 74 (11.4%)         | 20 (24.1%)     | 74 (11.4%)   | 20 (24.1%)     |        |
| Hospitalization <sup>c</sup> |                      |              |         |                  |                 |        |                      |              |                |              |         |                |                    |                |              |                |        |
| Hospital admission           | 73 (64.6%)           | 300 (48.5%)  | < 0.01  | 83 (66.6%)       | 290 (47.9%)     | < 0.01 | 49 (51.0%)           | 324 (51.0%)  | 54 (65.1%)     | 319 (49.2%)  | 0.93    | 54 (65.1%)     | 319 (49.2%)        | 54 (65.1%)     | 319 (49.2%)  | 54 (65.1%)     | < 0.01 |
| Number of days <sup>a</sup>  | 4 (2 - 13.5)         | 3 (1 - 7.75) |         | 2 (0 - 7.75)     | 3 (1 - 7)       |        | 4 (2 - 11.5)         | 3 (1 - 8)    | 3 (1.8 - 10.8) | 3 (1 - 8)    |         | 3 (1.8 - 10.8) | 3 (1 - 8)          | 3 (1.8 - 10.8) | 3 (1 - 8)    | 3 (1.8 - 10.8) |        |
| ICU admission                | 7 (6.2%)             | 28 (4.5%)    | 0.45    | 11 (8.8%)        | 24 (4.0%)       | 0.02   | 6 (6.3%)             | 29 (4.6%)    | 7 (8.4%)       | 28 (4.3%)    | 0.47    | 7 (8.4%)       | 28 (4.3%)          | 7 (8.4%)       | 28 (4.3%)    | 7 (8.4%)       | 0.10   |

<sup>a</sup>Data are displayed as median, with the first and third quartile given within parentheses.

<sup>b</sup>Comorbidity is defined as the presence of any co-existing diseases or disease processes additional to injury that the traumatic brain injury (TBI) patients sustained. The following diseases were assessed as comorbid disease: asthma, chronic bronchitis, chronic nonspecific lung disease (not asked about), heart disease, diabetes, back hernia or chronic backache, osteoarthritis, rheumatoid arthritis, and cancer.

<sup>c</sup>Hospital or ICU admission for ≥ 1 day after arrival at emergency department.

ICD, International Classification of Diseases; DSM, Diagnostic and Statistical Manual of Mental Disorders; RPQ, Rivermead Post-Concussion Symptoms Questionnaire; PCS, post-concussion syndrome; ISS, Injury Severity Scale; AISH, Abbreviated Injury Severity Scale of the Head; AIS, Abbreviated Injury Scale; ICU, intensive care unit.

SUPPLEMENTARY TABLE S3. DETERMINANTS IN RELATION TO PCS/NO PCS AT 6 MONTHS AFTER TBI WITH RATING SCORE 2

| <i>Post-concussion syndrome</i> | <i>Mapped ICD-10/DSM-IV</i> |                | <i>RPQ total score</i> |                | <i>RPQ3</i> |                | <i>Three factor model</i> |                |
|---------------------------------|-----------------------------|----------------|------------------------|----------------|-------------|----------------|---------------------------|----------------|
|                                 | <i>OR</i>                   | <i>95% CI</i>  | <i>OR</i>              | <i>95% CI</i>  | <i>OR</i>   | <i>95% CI</i>  | <i>OR</i>                 | <i>95% CI</i>  |
| Patient demographics            |                             |                |                        |                |             |                |                           |                |
| Gender (male)                   | 0.532                       | 0.382–0.721*** | 0.529                  | 0.374–0.748*** | 0.379       | 0.273–0.525*** | 0.586                     | 0.417–0.825*** |
| Education                       |                             |                |                        |                |             |                |                           |                |
| Primary/Secondary               | 1.732                       | 1.111–2.701**  | 1.685                  | 1.098–2.585**  | 1.551       | 1.039–2.316**  | 1.619                     | 1.041–2.516**  |
| Injury mechanism                |                             |                |                        |                |             |                |                           |                |
| Assault (no)                    | 0.376                       | 0.190–0.743*** | 0.252                  | 0.127–0.501*** | 0.344       | 0.177–0.669*** | 0.272                     | 0.138–0.538*** |
| Injury characteristics          |                             |                |                        |                |             |                |                           |                |
| ISS                             |                             |                | 1.030                  | 1.004–1.056**  |             |                |                           |                |
| AISH                            | 1.209                       | 1.007–1.452**  | 1.239                  | 1.002–1.531**  | 1.292       | 1.087–1.535*** | 1.219                     | 1.011–1.469**  |
| Other                           |                             |                |                        |                |             |                |                           |                |
| Comorbidity (no)                | 0.536                       | 0.378–0.761*** | 0.513                  | 0.354–0.743*** | 0.650       | 0.463–0.912**  | 0.520                     | 0.362–0.748*** |
| Hospital admission (no)         | 0.447                       | 0.317–0.631*** | 0.611                  | 0.414–0.903**  |             |                | 0.518                     | 0.361–0.742*** |
| <i>n</i>                        | 731                         |                | 731                    |                | 731         |                | 731                       |                |
| <i>R</i> <sup>2</sup>           | 0.131                       |                | 0.138                  |                | 0.100       |                | 0.111                     |                |

\*\*\**p* < 0.01; \*\**p* < 0.05; \**p* < 0.1.

PCS, post-concussion syndrome; TBI, traumatic brain injury; ICD, International Classification of Diseases; DSM, Diagnostic and Statistical Manual of Mental Disorders; RPQ, Rivermead Post-Concussion Symptoms Questionnaire; OR, odds ratio; 95% CI, 95% confidence interval; ISS, Injury Severity Scale; AISH, Abbreviated Injury Severity Scale of the Head.

SUPPLEMENTARY TABLE S4. DETERMINANTS IN RELATION TO PCS/NO PCS AT 6 MONTHS AFTER TBI WITH RATING SCORE 3

| <i>Post-concussion syndrome</i> | <i>Mapped ICD-10/DSM-IV</i> |                  | <i>RPQ total score</i> |                | <i>RPQ3</i> |                | <i>Three factor model</i> |               |
|---------------------------------|-----------------------------|------------------|------------------------|----------------|-------------|----------------|---------------------------|---------------|
|                                 | <i>OR</i>                   | <i>95% CI</i>    | <i>OR</i>              | <i>95% CI</i>  | <i>OR</i>   | <i>95% CI</i>  | <i>OR</i>                 | <i>95% CI</i> |
| Patient demographics            |                             |                  |                        |                |             |                |                           |               |
| Gender (male)                   | 0.482                       | 0.315–0.737***   | 0.542                  | 0.360–0.816*** | 0.399       | 0.253–0.630*** | 0.636                     | 0.497–0.813*  |
| Education                       |                             |                  |                        |                |             |                |                           |               |
| Primary/Secondary               | 1.802                       | 1.110–2.925**    | 1.821                  | 1.102–3.008**  | 1.796       | 1.014–3.182**  |                           |               |
| Injury mechanism                |                             |                  |                        |                |             |                |                           |               |
| Assault (no)                    | 0.264                       | 0.128 – 0.547*** | 0.337                  | 0.160–0.709*** | 0.211       | 0.101–0.443*** | 0.291                     | 0.173–0.491** |
| Injury characteristics          |                             |                  |                        |                |             |                |                           |               |
| AISH                            |                             |                  |                        |                | 1.232       | 0.974–1.559*   | 1.296                     | 1.025–1.640** |
| Other                           |                             |                  |                        |                |             |                |                           |               |
| Comorbidity (no)                |                             |                  | 0.023                  | 0.599–0.385**  | 0.591       | 0.366–0.954**  |                           |               |
| Hospital admission (no)         | 0.450                       | 0.291–0.694***   | 0.426                  | 0.280–0.649*** |             |                | 0.532                     | 0.316–0.895** |
| <i>n</i>                        | 731                         |                  | 731                    |                | 731         |                | 731                       |               |
| <i>R</i> <sup>2</sup>           | 0.092                       |                  | 0.109                  |                | 0.096       |                | 0.06                      |               |

\*\*\* $p < 0.01$ ; \*\* $p < 0.05$ ; \* $p < 0.1$ .

PCS, Post-concussion syndrome; TBI, traumatic brain injury; ICD, International Classification of Diseases; DSM, Diagnostic and Statistical Manual of Mental Disorders; RPQ, Rivermead Post-Concussion Symptoms Questionnaire; OR, Odds Ratio; 95% CI, 95% Confidence Interval; ISS, Injury Severity Scale; AISH, Abbreviated Injury Severity Scale of the Head.
